# Supplementary material for: Meso and micro-scale effects of loading and air scouring on nitrifying bio-cord biofilm
Source: Royal Society of Chemistry journal article supplement (doi:10.1039/c9ew00075e), 2019-01-01
Supplement: c9ew00075e1.pdf [file c9ew00075e1.pdf]

Supplementary Information

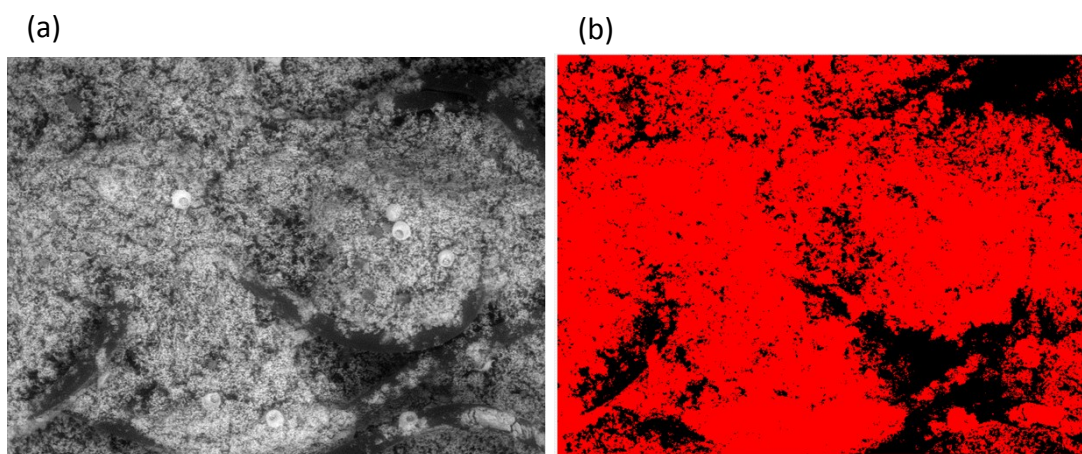

**Figure S1.** VPSEM images at  $\times 60$  magnification: (a) original VPSEM image of bio-cord substratum MK-PP50 (b) Ni Vision Assistant, Lab View 8.0, generated image highlighting biofilm area in red and porosity in black.
